# Supplementary material for: Evaporative controls on Antarctic precipitation: An ECHAM6 model study using novel water tracer diagnostics
Source: Copernicus journal article supplement (doi:10.5194/egusphere-2023-1041), 2023-06-09
Supplement: Supplementary file [file egusphere-2023-1041-AC2-supplement.pdf]

## Responses to comments of Referee #2

We are thankful for these valuable comments. These comments are very constructive in improving the manuscript.

This paper presents an analysis of the moisture sources of Antarctica based on a pre-industrial climate model simulation. The authors present a combination of tagged water tracers and source property tracers, which is new for this climate model. Overall, the results from this study are mostly consistent with and confirm previous model results. I find this study overall interesting and valuable, as the combination of these tracer diagnostics has not been applied to Antarctica before. **However, there are several aspects, including the connection to literature, the structure, selection and description of the material, and the claimed significance of the findings that require major revisions**, as detailed in the comments below.

We modified the manuscript based on these suggestions. Specifically, we improved the connection to previous literature; we added one subsection to evaluate the scaled-flux water tracer method; and we removed four figures in the appendix and reordered other relevant figures.

### Major comments:

1. There are several cases where the connection to previous literature is not made sufficiently clear. The findings here appear to be very consistent with previous results. I find it remarkable that different methods end up with such similar numbers. It should be stated more clearly that your results confirm previous work, thereby also maintaining and strengthening studies that have been building on similar numbers for source region contributions. This is an important conclusion that needs to appear in the abstract, the results, and the conclusions, with suitable referencing.

Response: We appreciate this comment, and we mentioned this consistency with existing literature in the abstract, results, and conclusion in the revised manuscript.

2. The authors claim a novel and in particular precise method is being used. However, there is almost no material that would underpin the validity of this claim, apart from figure B11 in the appendix, which in itself is not very convincing. Additional quantitative support for the equivalence of the method could for example originate from a mass-weighted mean of a setup of both latitude and longitude boxes. A section discussing the performance of the new method should be added.

Response: Thanks, we added a new section 2.2.1 to evaluate and discuss the performance of the new method. Please also see our response below to your specific comment on line 121 from the original manuscript.

3. In relation to that, it is not clear from the results when either one of the two tracer approaches is used, and when they are used in combination. It would help the reader to clarify the connection of findings to either of the two methods, and highlight the novelty and additional value of the authors' approach.

Response: Thank you for this point. We added this information in all relevant figures and text parts.

4. **The authors state the results are more precise, both in the abstract and elsewhere.** I think this statement is not entirely correct, since only weighted mean values are transferred to the target location. The uncertainty range or spread of source region properties at every location is simply not represented any more due to the averaging of source information. Maybe I misunderstood how the precision is meant, but in any case this is a topic that needs to be discussed critically.

Response: We agree with the reviewer on this point. As stated above, we added a new subsection 2.2.1 on this topic.

5. **Several key figures are not introduced and described properly, only a general takeaway is given.** This makes it difficult for the reader to follow the argumentation, and to go back and forth between text and figures. See detailed comments.

Response: We ensured that all figures and panels are properly referenced now.

6. The selection of material and its placement need improvement. There are too many figures and figure panels in the appendix, some of which are extensively described in the main text, others only stand with a reference and figure caption. The authors should carefully consider which figure panels are central to their results and needed to underpin their findings, and which can be removed. At the moment, there is a lot of figure material that the reader is left with on their own. **As a general recommendation, remove all those panels that are not relevant for the flow of the argumentation, and include those that are discussed in the text in the main manuscript.**

Response: Thank you. We removed four figures in the appendix (Fig. B4, B7, B9, and B10 in previous version) and replaced one into the main text.

7. Consider changing some aspects of the writing style. For example, section title 3.2 to 3.5 are formulated as questions, which I find not entirely fitting as a title. **There are some paragraphs that serve as table of content for sections to come, which perturb the flow of reading, rather than being helpful.** There are also a few casual formulations, such as referring to the simulation as "our"

simulation. As a reader, I wonder why the authors put such strong ownership into a study object.

Response: We appreciate these comments. Titles of section 3.2 to 3.5 are changed. Paragraphs serving as table of content are removed. We also removed all statements that might show such ownerships.

8. The significance of the wind speed differences at the source regions in general, and when they contribute to Antarctic precipitation, is not clear. There is also a claim of thermodynamic evaporation effects in the abstract, while wind would usually be considered as a result of pressure gradients and thus atmospheric dynamics rather than thermodynamics. Since the authors present this as a major finding, the overall reasoning and significance of this result should be presented more clearly.

Response: Thanks, we rephrased wind speed as a dynamic control. The reasoning of stressing the significance of the wind speed differences is rephrased, see responses to comments on L. 14-16 below.

9. The distinction between high and low precipitation events could be shortened considerably.

Response: Thanks. It is shortened in Section 2.3.

10. **There is overall too little mentioning of limitations and critical evaluation of the method.** For example, the tracer method does not allow to reconstruct source footprints, and it only transfers a weighted average of the source properties, not their original range of values.

Response: Thank you for these valuable points. These are added to the new section 2.2.1.

### Minor comments

L. 4: precise: maybe rather say 'detailed'? There is no complete uncertainty range available from this method, but that does not make it more precise.

Response: Thank you. It is changed to "detailed".

**L. 14-16: Moreover, ...: not clear that this is a result which should be highlighted in the abstract. What is the concrete relevance of this finding?**

Response: Thanks for pointing this out. We do think this is a relevant finding and should be highlighted in the abstract.

This finding highlights the impact of wind speed on evaporation and moisture supply for the atmospheric water cycle. It provides a new perspective to think about changes in

atmospheric water cycle under climate changes. In addition to increased moisture holding capacity of a warming atmosphere, we suggest that changes in moisture supply through oceanic evaporation also play a role in the intensification of global water cycle.

Indeed this was also pointed out in the paper by Sodemann and Stohl, (2009): “During both seasons, moisture sources for Antarctic precipitation are distributed annularly in the Southern Ocean, with distinct maxima in the Indian Ocean sector at about 40°S. This corresponds to a maximum of **surface wind energy** associated with fronts that are related to maxima in cyclone density and baroclinicity further south [Simmonds et al., 2003].” And “the evaporation contribution maxima in the Indian Ocean and the Pacific sector are associated with maxima in latent heat flux and **surface wind velocity**.”

Here we show additional evidence relating wind speed and oceanic evaporation.

L. 30-33: The topic sentence here is on diamond dust, but then the discussion switches immediately to marine air intrusion events. I think the topic sentence should be about precipitation in general instead.

Response: We appreciate this comment. We added one topic sentence: “Antarctic precipitation can manifest in various forms.”

**L. 43 onward: It has long been known that there are thermodynamic limitations in how vapour can reach low-lying and higher areas of Antarctica, see for example Fig. 3 in Stohl and Sodemann (2010). This would be helpful to include here, since the discussion comes back to this aspect later in the manuscript.**

Response: Thanks, it is included now.

L. 48: "dominate" - this seems to contradict the statements above in line 32.

Response: Changed to “contribute significantly to”.

L. 57: "moisture flux tracks" - rephrase as "moisture transport paths"

Response: Changed.

L. 59: "most commonly" - I think this can be debated, different tools have dominated in different time periods, and source region tracers came definitely first

Response: Yes, We changed it to “One of the widely applied tools”.

L. 60 onward: I think it would be useful here to state what was found in these studies, since you come back later to this, and compare. For example, what were the main source regions, the average latitude, pattern.

Another aspect that would be fair to bring up here is that these Lagrangian studies allow to obtain maps of the source regions at spatial detail, which does not seem to be available easily from either of the methods applied here.

Response: Thank you for this comment. We fully agree and added the following:

“Based on a meteorological analysis dataset from October 1999 to April 2005, Sodemann and Stohl (2009) diagnosed moisture sources and sinks through changes in specific humidity along transport pathways of air parcels. While only ~90% of total precipitation could be attributed to specific sources with 20-day backward trajectories, annual moisture source latitudes of precipitation over Antarctic Plateau were estimated to be 45 to 40° S. Moisture source longitudes were generally located at 20 to 60° to the west of precipitation locations. They also pointed out seasonal variations in moisture source latitudes of Antarctic precipitation, which are related to Antarctic topography, sea ice, baroclinicity, and mid-latitude land-sea distributions.”

It is indeed possible to get such maps of moisture source contributions to precipitation at a specific location or whole of Antarctica from the water tracing methods, though in an approximated way. The following figure shows contributions of each grid box (1° \* 1°) to annual mean precipitation at Dome C, based on the scaled-flux water tracing method. To obtain these contributions, we attribute daily precipitation at Dome C to a grid box where the moisture source latitude and longitude are located at (i.e. projecting daily precipitation backwards to evaporative sources). Then by summing up over 60-year period, we get these relative contributions. This is not the same as backward projection from Lagrangian trajectories, as there is a mixing of different moisture sources (so some precipitation is attributed to land masses).

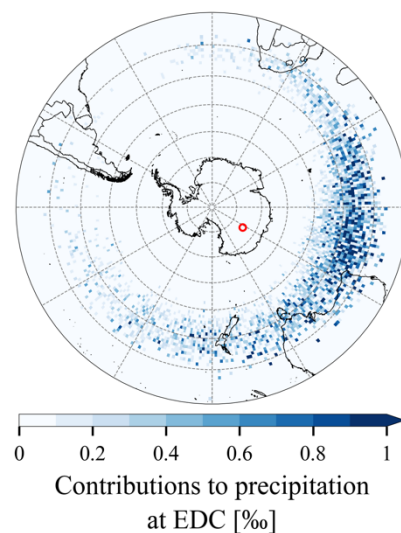

L. 69: "While..." I do not understand where this information belongs. Rephrase?

Response: Thank you. We found that this sentence is confusing for many readers and does not provide much valuable information, so it is removed.

L. 76: "For the first time..." - I do not think this is a valid claim. There have been many studies before of Antarctic precipitation origin, both from climate model tracers and with trajectory approaches. As all other approaches, your methods have their limitations. I recommend to moderate this statement.

Response: Fully agree and removed.

L. 80-83: This table of content sentences appear unnecessary and can be removed.

Response: removed.

L. 93: Please state the exact elevation difference

Response: Thanks for this comment. This is also mentioned by the first referee in the 8<sup>th</sup> comment. We removed this statement in that response.

L. 101: This is a bit of a confusing statement. Wind at the surface is by definition zero. The equation also just states the wind at the lowest surface level, rather than a vertical wind gradient.

Response: Yes, we agree. We changed the wording to "the wind speed at the lowest model level".

L. 121: Since this is a new implementation, some demonstration of the performance and evaluation should be given in the main manuscript. The comparison shown in Fig. B11 is also not very convincing, and only considers the "easy" case of latitude boxes. How well does this compare to, for example, in a setup with longitude boxes?

Response: We agree that such a suggested demonstration of the performance of our approach in the main manuscript would be helpful. Thus, we have added a subsection 2.2.1 to evaluate the scaled-flux water tracing method.

The comparison of a latitude vs. longitude setup is a very good question. We did similar analysis as Fig. B11 for all other source properties, as shown in the following figure for source longitude. The first row shows moisture source longitude of annual, DJF and JJA precipitation based on the scaled flux water tracing method. The second row shows the differences between the first row and moisture source longitude based on the prescribed-region water tracing method, which divides the globe into 20°-wide longitude bins. The third row is similar as the second row, but with 10°-wide longitude bins. A similar figure for source SST is attached below as well. The case for SST is slightly more complicated, because the source region varies at every time step with the variations of SST.

Since the two different tracing methods provide very similar results, and prescribed-region water tracers with finer bins provide results in closer agreement to scaled-flux water tracers as prescribed-region tracers with coarser bins, we are confident that the scaled flux tracers correctly reflect moisture source regions and properties in ECHAM6.

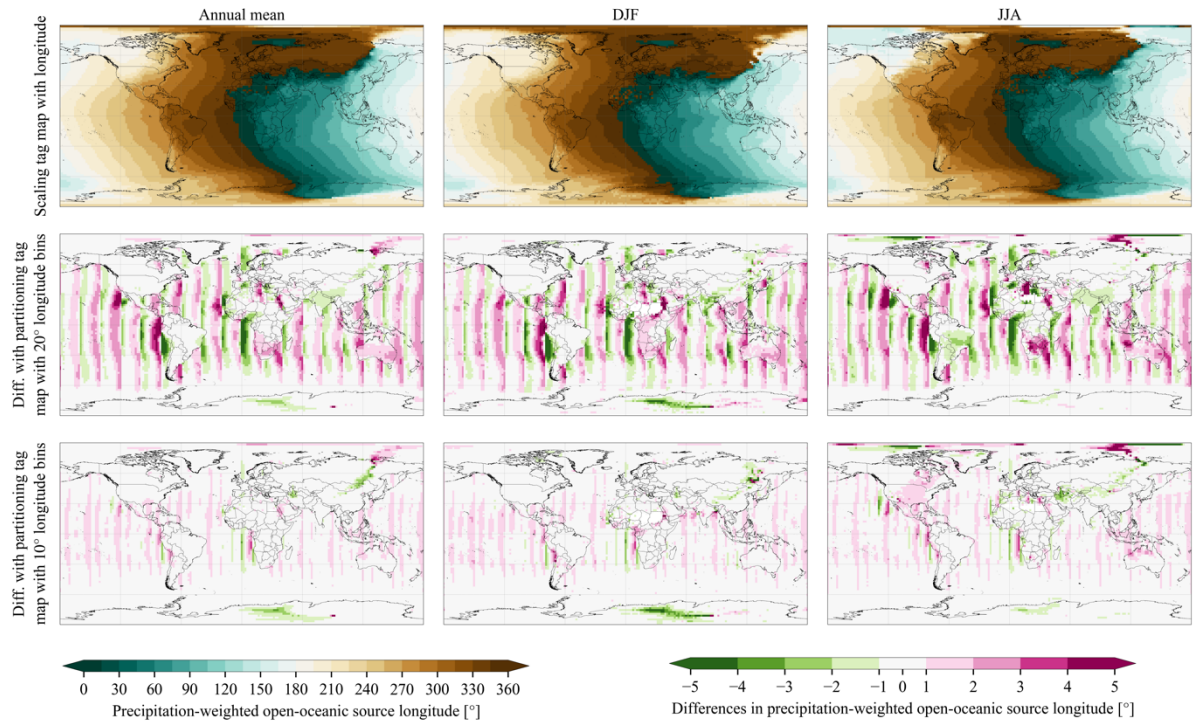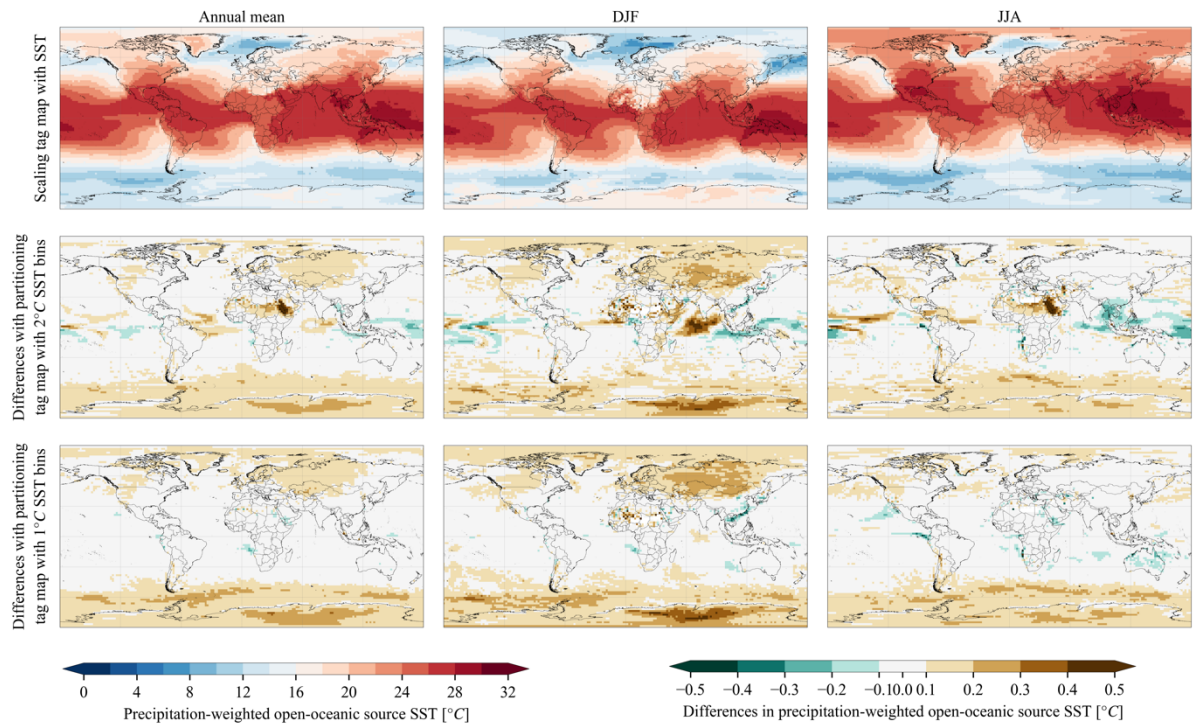

L. 125: The direct source-sink distance with underestimate the transport distance.

Response: True, we changed it to “Note that this geographical distance is smaller than the actual transport distance of the moisture.”

L. 135: **0.002 mm day<sup>-1</sup> is a much smaller number than can be measured in reality.** How useful is it to define this threshold? How sensitive are your results to

the choice of this threshold? This is an example for factors that contribute to the uncertainty of your results and conclusions, and should be discussed openly.

Response: We are not sure about the lowest precipitation amount that can be measured in the field, but we found daily precipitation amount lower than 0.002 mm/day observed over Dome C in the supplementary file of [Stenni et al. \(2016\)](#). Also note that this threshold is applied for a grid-box mean precipitation amount, rather than a specific site.

While [Turner et al. \(2019\)](#) used a larger threshold of 0.02 mm/day to define a precipitation day, we find it necessary to use a smaller threshold for our case. As shown in the following figure (a) and (b), days with a precipitation rate lower than 0.02 mm/day can contribute up to 10% of total precipitation over the Antarctic Plateau in both (a) ERA5 and (b) ECHAM6. So it might be problematic to exclude them.

We made this choice to make the analysis more robust, though our results are not very sensitive to the choice. As shown in Figure (c) and (d), the differences between moisture source latitude of heavy precipitation and the rest of precipitation are similar for a threshold of (c) 0.002 mm/day and (d) 0.02 mm/day. Though, the choice of 0.002 mm/day makes the results more conservative (slightly smaller magnitude of anomalies in c than d), because a smaller threshold means more days are included as heavy precipitation by definition, which leads to smaller differences to the rest of precipitation.

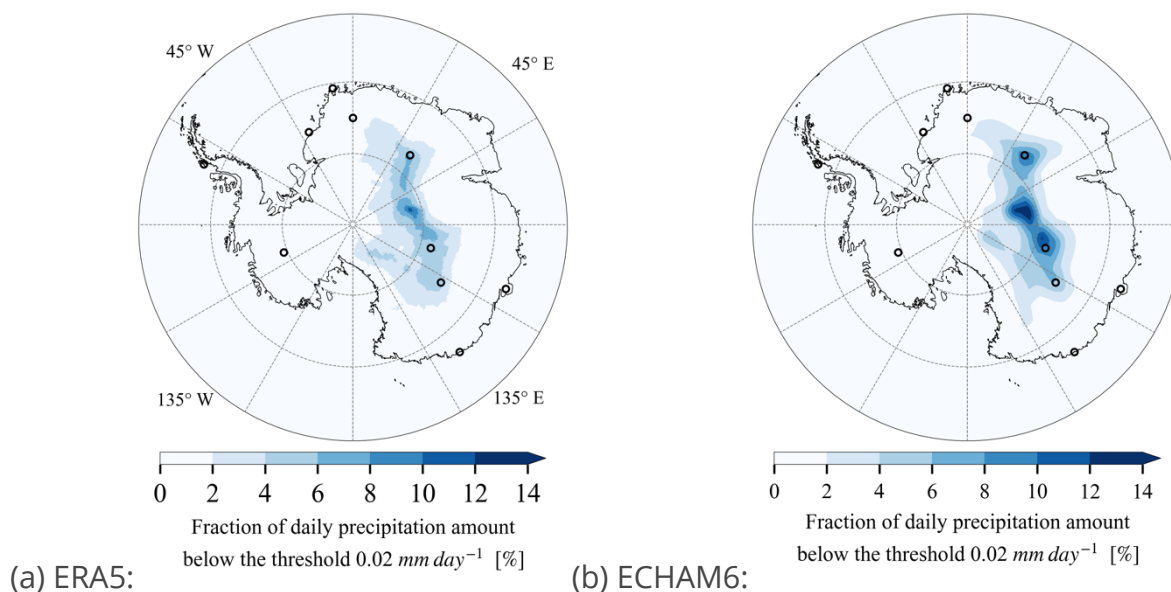



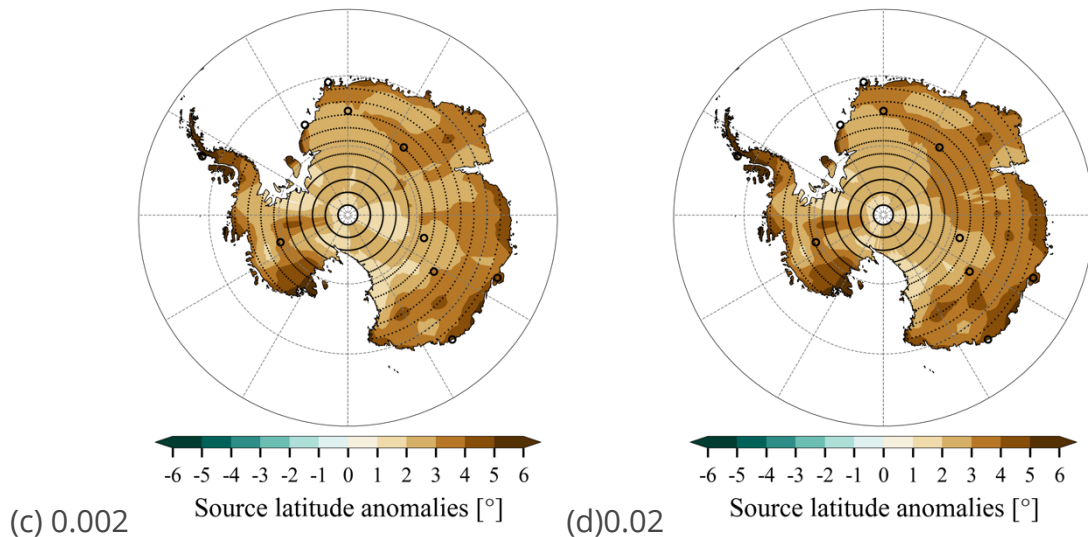

L. 140: It is not clear whether this percentile is a local choice at every grid point, or for the overall precipitation

Response: It is for the overall precipitation. The statement is now modified: "This is because a definition of light precipitation as the 10% lowest precipitation days would contribute to less than 0.3% of total Antarctic precipitation, and less than 1.1% of total precipitation at individual grid boxes."

L. 147-151: This table of contents section is not needed and can be removed

Response: Thanks, removed.

L. 153: Figure 1 is not introduced and described properly, only a general takeaway is given. This makes it difficult for the reader to examine the figure. The same applies to many other figures in the manuscript. Individual figure panels need to be referred to in the text.

Response: Thank you for this comment. We added the reference to individual figure panels where relevant. We will also make sure other figures and subpanels are properly introduced.

L. 160: Fig. B3 and B4 are discussed in the text, so it would be natural to include those with Fig. 1 as sub-panels. Fig. B4 would come logically before Fig. B3.

Response: Thanks. We removed Fig. B4 as a response to your major comment #6. Though Fig. B3 shows that seasonality of Antarctic precipitation is captured in ECHAM6 preindustrial simulation compared to ERA5 and it would be nice to show this figure in the paper, we prefer to put it in the appendix to limit the amount of figures in the main text to a minimum to stress the findings.

L. 167: "suggests that both": I find this conclusion too vague. Can this be documented concretely? How do we know the information in Fig. B5 is sufficient as a basis for further analysis?

Response: Yes. We added the following to the main text: “Simulation results deviate less than one standard deviation from ERA5 for both MSLP at 40° S and 65° S (Fig. B4a) and for their differences (Fig. Bb). Root mean squared errors between simulated and assimilated MSLP at 40° S and 65° S, and their differences, are 1.0, 1.4, and 1.5 hPa, respectively.”

Section 3.2 does not work well. **I understood only much later that you use here the source region tracer to extract the provided information** (if I understood correctly). The information in Fig. 2 and 3 is not introduced and described well enough to capture the information easily. Can Fig. 2 and 3 be combined into one figure? Fig. 3 would also be more logical to look at before Fig. 2.

Response: Thank you for bringing this up. We added in the figure caption whether the moisture source information is from prescribed-region or scaled-flux water tracers. We also added the related information in the text.

We also switch the position of Figure 3 and 2 now. Though we describe Fig 2 and 3 together, it might be better not to combine it to avoid confusion. We added a reference to each subpanel to further strengthen the link between text and figures.

L. 176: Where in Fig. 3 can these percent contributions be seen?

Response: We removed the reference to Fig. 3 here to avoid confusion. The total contributions from AP/EAIS/WAIS are not displayed in the figures.

L. 177: the maximum -> it's maximum

Response: changed

Figure 4: This is an interesting figure, but I am not sure I interpret it correctly, and it is only discussed briefly. Is this figure showing all moisture in the atmosphere, or only such that contributes to precipitation in Antarctica? Has this result been obtained with the source region tracer, or the source property tracer?

Response: This figure shows all moisture in the atmosphere originated from the open ocean. We also added in the figure caption: “Moisture source latitude information is derived from the scaled-flux water tracers.”

L. 186: In this context, there are several studies that can be referred to, including Stohl and Sodemann, 2010 and Terpstra et al., 2021.

Response: We added the suggested citations.

L. 203: milder -> warmer

Response: Thanks. This sentence is deleted based on responses to comment 26 of the 1<sup>st</sup> referee.

L. 204: "may also play a role": can this speculation be backed up in some way?

Response: We rephrased it: "We propose that weaker westerlies in DJF compared to JJA, induced by smaller meridional thermal gradients, may promote equatorward shifted moisture sources (see Sec 3.5 for details)."

This speculation is partly backed up through analysis in Sec 3.5, where we find that negative SAM phases associated with weaker westerlies are linked to equatorward shifted moisture sources.

L. 207: "We speculate that...": can this be investigated further in the light of previous studies? Sodemann and Stohl (2009), their Fig. 1 and 2, have maps that can be directly compared to your results.

Response: Thanks, we added the following sentence: "This pattern is also observed in the results of Sodemann and Stohl (2009) for DJF precipitation (see their Fig. 2c)." and "This would need to be investigated through Lagrangian moisture trajectory diagnostics."

L. 209: Figure B6b seems to contain important information, should it no then be part of the main text?

Response: It is true that Figure B6 contains important information regarding seasonality of moisture sources, as described in the following text. But this figure with 30 panels might be overwhelming for many readers, so we prefer to only extract key messages from it for the main text and put the complete figure in the appendix for interested readers.

L. 211: "Having dealt with...": rephrase, find a better connection/transition.

Response: Changed to "After studying moisture source regions and locations".

L. 223-226: rephrase to provide a more direct message. What are "other forms of storms"?

Response: Changed to "extratropical cyclones propagating along the Southern Ocean storm track" based on comment 32 of the 1<sup>st</sup> referee.

L. 229: Eq. 1 does not contain rh2m nor SST

Response: True, we rephrased it to "Firstly, oceanic evaporation is related to wind10, rh2m, and SST (Eq. 1)."

L. 229: Hard to follow the discussion here. Can it be said more clearly what decouples from one another?

Response: Yes, we changed it to "moisture source properties can be slightly decoupled from moisture source locations because of their impacts on evaporation" based on comment 33 of the 1<sup>st</sup> referee.

L. 231-238: This message in this text is not very clear. What exactly is the difference between panels a and b? How do you explain the difference? And why is this a thermodynamic control? Wind speed would generally be categorized as dynamic rather than thermodynamic.

Response: We rephrased this paragraph. While Panel a is moisture source wind10 of annual mean Antarctic precipitation, Panel b is annual mean wind10 at the moisture source latitude and longitude of annual mean Antarctic precipitation. The differences indicate that evaporation occurs preferentially during higher wind speeds at oceanic grid boxes. We changed the wording also to express that wind speed is categorized as a dynamic control.

Could it be interesting to set these findings in perspective with histogram plots, and identify the percentile of evaporation events that contribute on average to Antarctic precipitation?

Response: We fully agree that it is interesting to associate strong Southern Ocean evaporation events with Antarctic precipitation, as pointed out by comment 31 of the 1<sup>st</sup> referee (Aemisegger and Papritz, 2018). While this is out of the scope of this study, we will consider it in the future with historical and future simulations.

L. 241-246: It is not clear what information should be picked up from this paragraph, and what is the conclusion. The information is provided in an appendix figure instead of the main text, which makes it very difficult to see the relevant information together with the text. Either this paragraph and the appendix figure should be removed, or selected panels be shown in the main text to make the information accessible.

Response: Thanks for this point. We shortened the text and combined it with the previous paragraph as below:

“Secondly, annual cycles of source latitude and properties are controlled by meridional thermal gradients, sea ice variations, and seasonal climate variations at mid-latitudes. For example, precipitation is from more southern oceans in MAM because of less sea ice than JJA (Fig. B4a3 vs. a4); precipitation is from warmer oceans in MAM due to higher SST at mid-latitudes than JJA (Fig. B4d3 vs. d4); and precipitation is from less windy regions in DJF due to weaker westerlies than JJA (Fig. B4f2 vs. f4).”

As said in the previous response, we tend not to put Fig. B4 in the main text.

L. 253: This appendix figure is not self-explaining. How does it connect to what is said in the text? Is this a necessary figure to include?

Response: This figure is removed.

L. 254: The contents of Fig. 8 are not described here, but after Fig. 9 is introduced. Reorder figures or discussion.

Response: Figures have been reordered.

L. 258: "This hypothesis...". I have the impression the word hypothesis is used wrongly here. Terpstra et al., (2021) rather state this as a finding of their case study, and you hypothesize that this can be of more general validity, which is what you test in your analysis - correct?

Response: Yes, it is changed to "This finding".

Figure 8: How important is the **0.001 mm day<sup>-1</sup>** threshold value for these results?

Response: As described in the previous response, a change in threshold from 0.02 mm/day to 0.002 mm/day does not change the results nor conclusion significantly.

Figure 9: Do all these figure panels need to be shown? Not all of them are discussed sufficiently at the moment.

Response: Yes, all figure panels are referenced, and thus we prefer to show all panels.

The positive source latitude difference being more equatorward is counter-intuitive. Can this be reversed?

Response: Thanks, this is good to know. But we are sorry that there might not be a perfect wording for everyone. We thought the stated positive difference is intuitive because the magnitude of latitude is from -90 to 0 in the Southern Hemisphere.

L. 263: I would make sense to flip numbering of Fig. 8 and 9 as they appear in the manuscript.

Response: Thanks, flipped.

L. 287: Figure 10 is not properly introduced and described, only a general conclusion is given. As a reader, I am left alone in the interpretation of Fig. 10.

Response: Thank you. Figure 10 is introduced in the 2<sup>nd</sup> to 5<sup>th</sup> paragraph of Section 3.5. Each paragraph references to an individual panel. This should cover the main message we would like to deliver with these figures.

Figure B9: If this is a valuable result figure, it should be part of the main text, otherwise left out.

Response: It is left out now.

L. 303: Posing a rhetorical question in a text can be confusing to the reader. Who should answer this?

Response: Thanks. It is modified: "So, we investigated whether SAM exerts control over the frequency or intensity of heavy precipitation."

L. 305: Fig. B10 is not described in the main text or appendix. If this is valuable material to include, it needs to be described properly somewhere.

Response: Thanks. It is removed.

L. 312: "we develop the dynamic": The impact of this tracking is not shown or discussed in the manuscript, and can thus not be part of the conclusions.

Response: Thanks, removed.

L. 315: "our preindustrial": puzzled by this ownership statement.

Response: Thanks, we removed all such statements.

L. 319: "spatial patterns are...": unclear what this statement means.

Response: We changed it to: "spatial patterns of the contributions are influenced by the topography".

L. 322: Bailey et al., 2019: is this the only/most relevant study to include? There are several older studies that looked into these aspects.

Response: Thanks, we added: "Stohl and Sodemann, 2010"

L. 323: The findings here appear to be very consistent with previous results. I think that is remarkable, that different methods end up with such similar numbers. It needs to be stated clearly that your results are confirming other work, maintaining and strengthening previous work that builds on these numbers. This is an important conclusion that needs to appear in the abstract, the results, and the conclusions, with referencing.

Response: Thank you for this point. We added in the conclusion: "These results are consistent with estimates based on Lagrangian trajectories (Sodemann and Stohl, 2009), which suggests a source latitude range of 45° S to 40° S for precipitation over the Antarctic Plateau."

L. 328: "more precise value": as stated earlier, I am not convinced this is true. Your method advects mass-weighted averages, which means that part of the underlying variation is simply not visible.

Response: Thanks, we explain these points now in the new subsection 2.2.1.

L. 339: It might be useful to distinguish the HP/LP results and SAM results in two sentences or paragraphs.

Response: Yes, we agree. We split it into two paragraphs in the revised manuscript.

## References

Stohl, A., and Sodemann, H. (2010), Characteristics of atmospheric transport into the Antarctic troposphere, *J. Geophys. Res.*, 115, D02305, doi:10.1029/2009JD012536.

**Citation:** <https://doi.org/10.5194/egusphere-2023-1041-RC2>
